# Supplementary material
Source: publisher figshare collection journal article supplement (https://gsajournals.figshare.com/ndownloader/files/21191808)
Supplement: Supplementary file 1 [file 21191808]

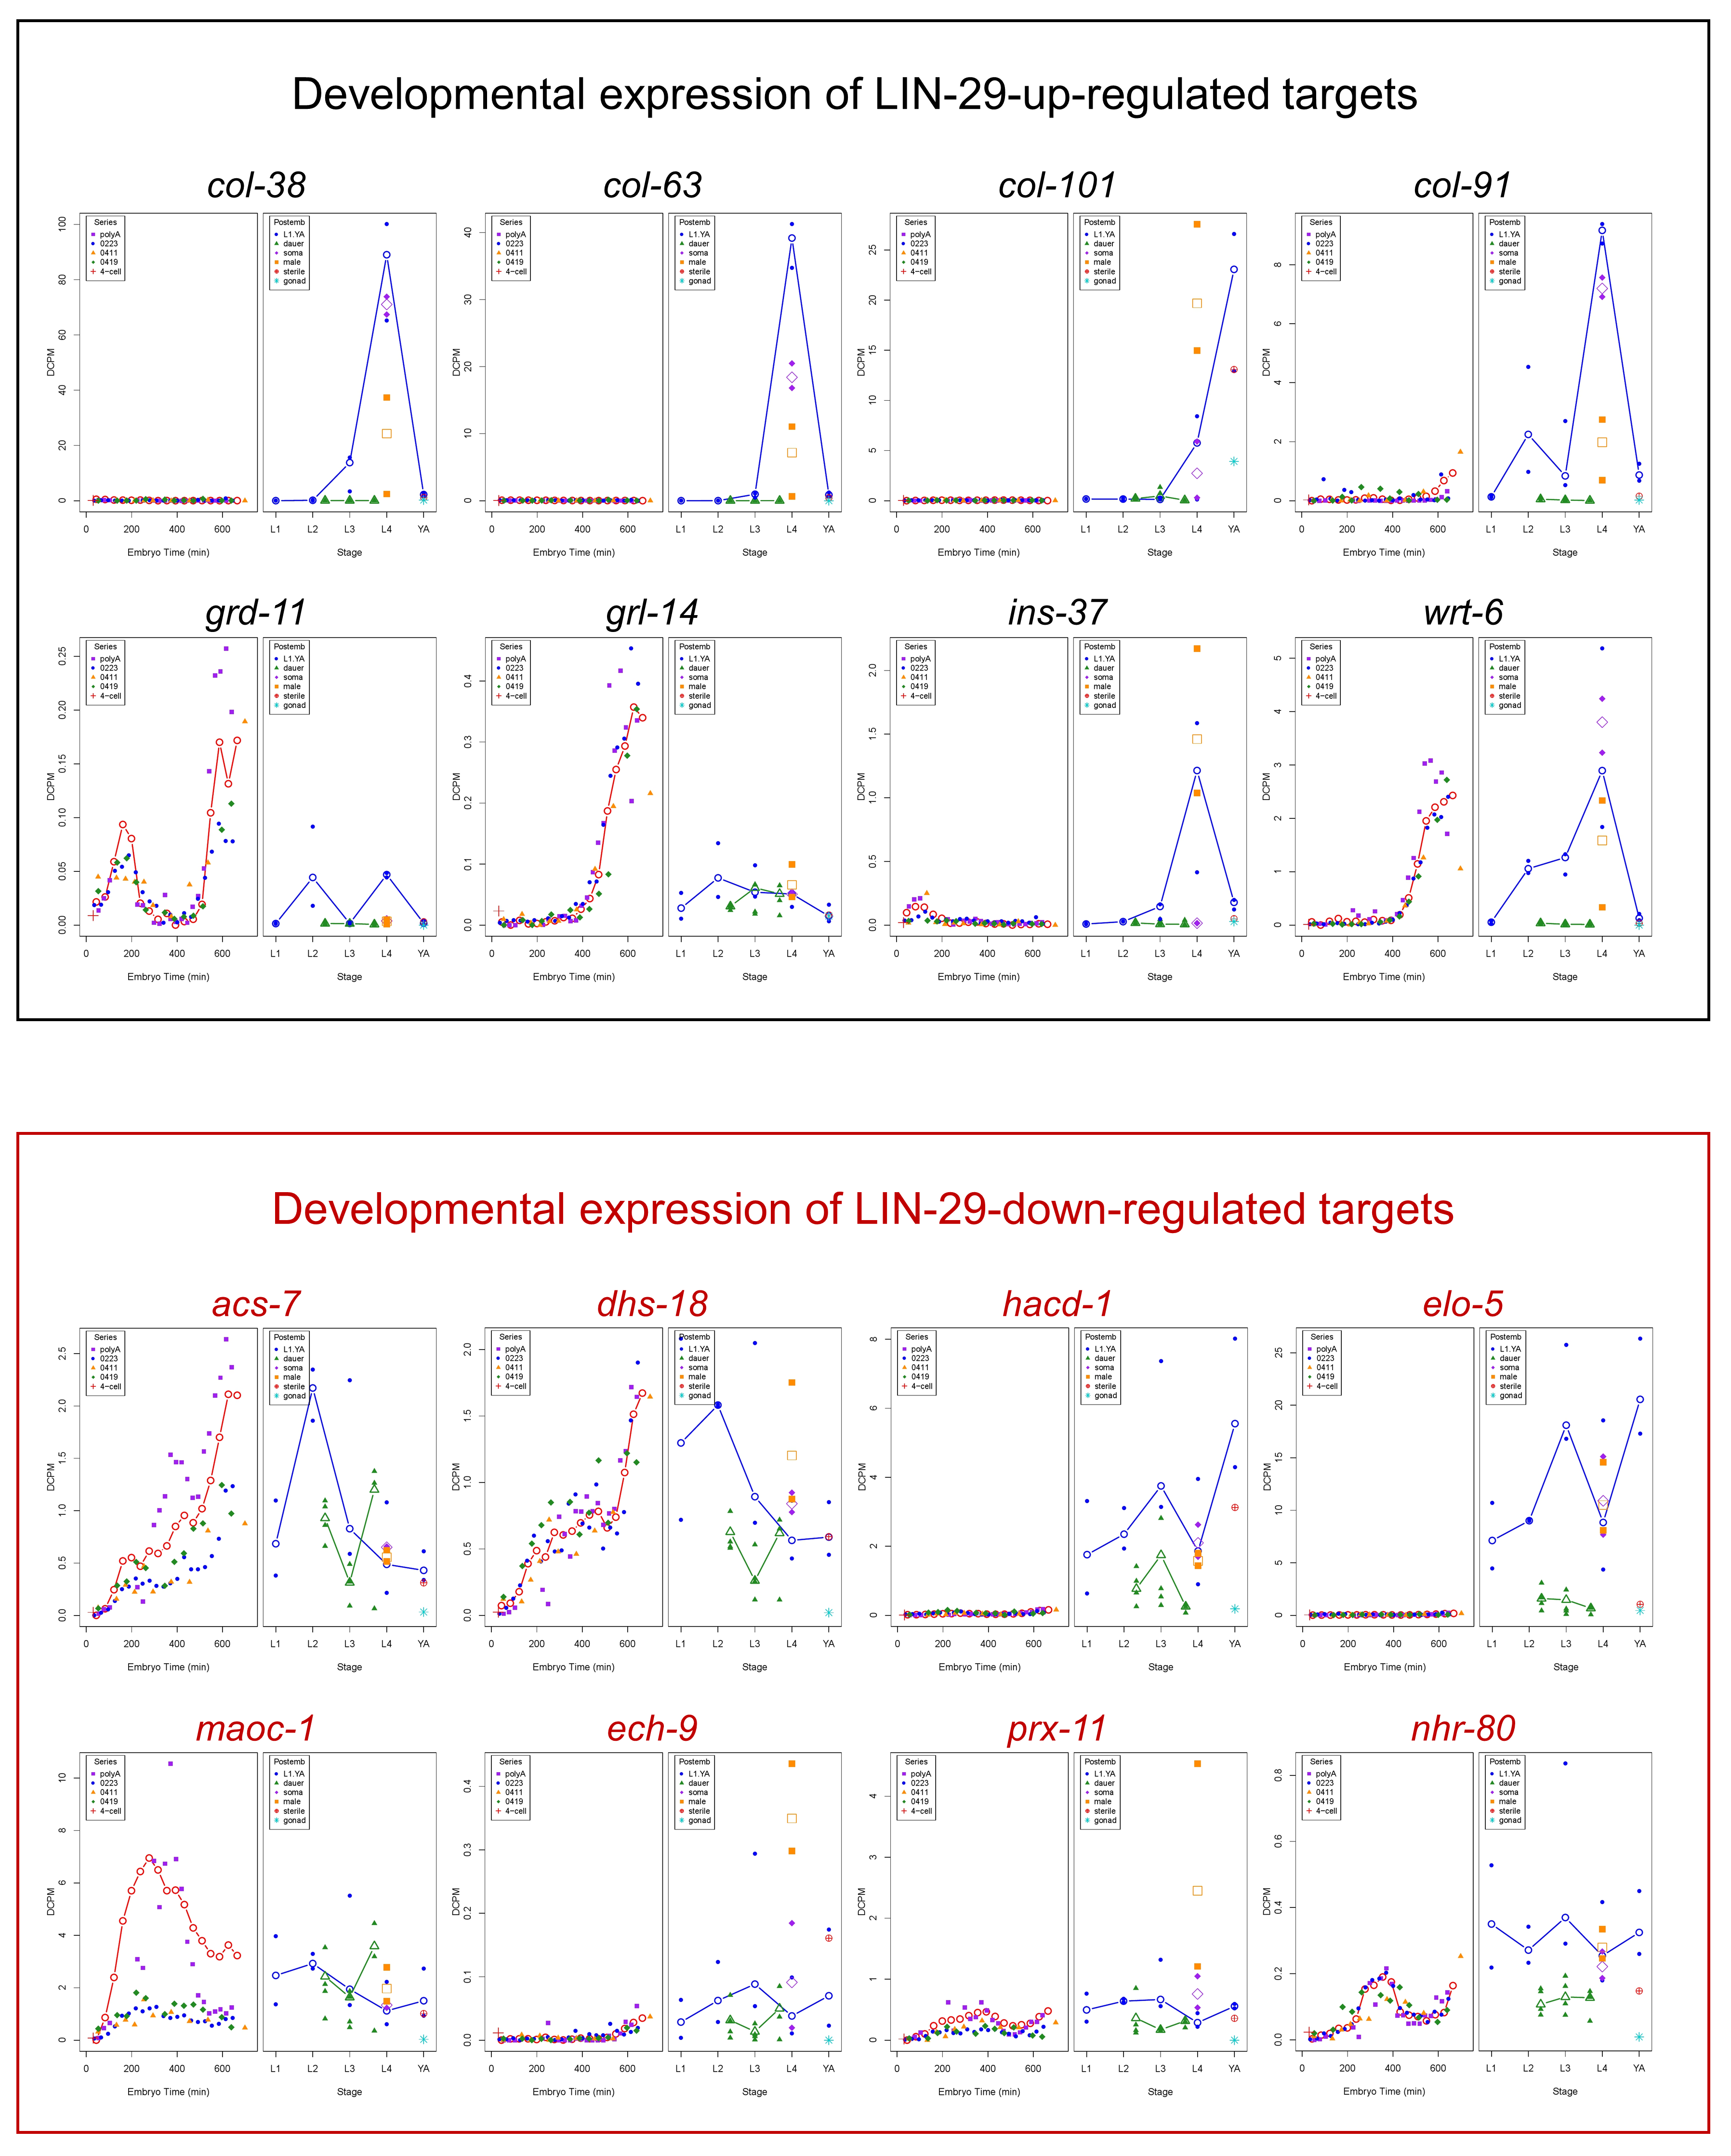


**Figure S7. Developmental RNA-Seq data of LIN-29 target genes.** Wild type expression data from modENCODE is shown for eight LIN-29-up-regulated genes (top, black box) and eight LIN-29-down-regulated (bottom, red box) genes. For each gene, the left panel shows detailed embryonic expression (which is not relevant to this work) while the blue line in the right panel shows postembryonic expression values for each gene in the L1, 2, L3, L4 and young adult stages (Gerstein *et al.* 2010; Boeck *et al.* 2016). Graphical representations were obtained with GExplore 1.4 (Hutter and Suh 2016).
